# Supplementary material for: Electronic waste exposure and DNA damage: a systematic review and meta-analysis
Source: publisher site journal article supplement (doi:10.1515/reveh-2021-0074), 2021-10-29
Supplement: Supplementary file 1 [file j_reveh-2021-0074_suppl_001.docx]

Electronic waste exposure and DNA damage: A systematic review and meta-analysis

Ibrahim Issah1*, John Arko-Mensah1, Thomas P. Agyekum1, Duah Dwomoh2, Julius N. Fobil1

1Department of Biological, Environmental and Occupational Health Sciences, School of Public Health, University of Ghana, Legon- Accra, Ghana; [papaarko@yahoo.com](mailto:papaarko@yahoo.com) (J.A.-M.); [thomaspagyekum@gmail.com](mailto:thomaspagyekum@gmail.com) (T.P.A); [jfobil@gmail.com](mailto:jfobil@gmail.com) (J.N.F)

2Department of Biostatistics, School of Public Health, University of Ghana, Legon –Accra, Ghana; [duahdwomoh@yahoo.com](mailto:duahdwomoh@yahoo.com) (D.D)

*Address correspondence to Ibrahim Issah,

[ibrahimissah111@gmail.com](mailto:ibrahimissah111@gmail.com)

1. Supplementary table 1: Search strategies and results from different electronic databases
2. Supplementary table 2: Excluded articles and the reasons for their exclusion

Supplementary table 1: Search strategies and results from different electronic databases

| Databases | Keywords | Results |
| --- | --- | --- |
| MEDLINE with Full Text, Academic Search Complete, CINAHL Complete, Education Research Complete, GreenFILE, Health Source: Nursing/Academic Edition, Library, Information Science & Technology Abstracts | ( "electronic waste"  OR  "e-waste"  OR  "WEEE" )  AND  ( "DNA damage"  OR  "chromosomal aberration"  OR  "DNA strand breaks"  OR  "micronucl*"  OR  "Sister chromatid exchanges"  OR  "oxidative DNA damage"  OR  "genotox*"  OR  "oxidative stress" ) | 83 |
| ProQuest central…1998-aug 2020 | (("electronic waste" OR "e-waste" OR "WEEE") AND ("DNA damage" OR "chromosomal aberration" OR "DNA strand breaks" OR "micronucl*" OR "Sister chromatid exchanges" OR "oxidative DNA damage" OR "genotox*" OR "oxidative stress")) AND PEER(yes) | 654 |
| SCOPUS..2008- Aug. 2020 | TITLE-ABS-KEY ( ( "electronic waste"  OR  "e-waste"  OR  "WEEE" )  AND  ( "DNA damage"  OR  "chromosomal aberration"  OR  "DNA strand breaks"  OR  "micronucl*"  OR  "Sister chromatid exchanges"  OR  "oxidative DNA damage"  OR  "genotox*"  OR  "oxidative stress" ) ) | 85 |
| Hand search |  | 1 |
| Total |  | 823 |
| Duplicates |  | 106 |
| Total after duplicates |  | 717 |

Supplementary table 2: Excluded articles and the reasons for their exclusion

| Author(s)/year | Resason for exclusion |
| --- | --- |
| Alabi and Bakare (2017) | 1 |
| Alabi et al. (2012) | 3 |
| Alam et al. (2019) | 3 |
| Awasthi (2016) | 1 |
| Du et al. (2018b) | 1 |
| Du et al. (2018a) | 4 |
| Grant (2013) | 1 |
| Khlaif and Qumsiyeh (2018) | 2 |
| Lu et al. (2017) | 2 |
| Song (2015) | 1 |
| Zhang et al. (2012) | 3 |
| Zhang et al. (2016) | 2 |
| 1) Not original study (e.g. reviews); 2) shared the same population and outcome variable with another article reported in this review; 3) objective did not meet inclusion criteria (e,g. not human study or did not measure DNA damage; 4) retracted article | |
